# Supplementary material for: High Glucose Stimulates Tumorigenesis in Hepatocellular Carcinoma Cells Through AGER-Dependent O-GlcNAcylation of c-Jun
Source: Oxford University Press journal article supplement (doi:10.2337/db15-1057), 2016-01-29
Supplement: db151057supplementarydata2.xls [file db151057supplementarydata2.xls]

## Sheet: 工作表1
Supplementary Table 2. Changes of metabolics by AGER
SMMC-7721 cells
Metabolites	Fold change(AGER overexpression/Control)	t test p value
lactic acid	0.457204	1.1543e-08
D-Talose	1.92422	1.69353e-09
alanine	0.394671	6.90913e-08
phosphate	1.17686	0.0315591
Galactinol	3.58594	0.0707827
beta-Mannosylglycerate	4.43517	8.18637e-10
tyrosine	1.25818	1.97538e-05
serine	1.18961	1.15306e-05
glutamic acid	0.702947	0.00275441
threonine	1.07364	0.0462631
Leucrose	2.17753	5.19535e-07
Isoleucine	1.22447	1.94223e-05
valine	1.19463	9.69989e-06
beta-Alanine	0.539113	0.000166222
Isopropyl-beta-D-thiogalactopyranoside	2.2051	2.58089e-08
phosphomycin	1.36465	0.0053085
glutamine	29.1789	1.46519e-05
Dioctyl phthalate	6.64691	3.19651e-05
Threitol	0.476411	3.62163e-08
lysine	1.44273	3.67191e-05
leucine	1.31224	1.7563e-06
phenylalanine	1.13117	2.53931e-05
Bel-7402 cells
Metabolites	Fold change(AGER overexpression/control)	t test p value
lactic acid	0.594576	1.52259e-12
D-Talose	2.32106	4.93595e-14
phosphate	1.06292	0.00597678
tyrosine	1.45648	2.05065e-12
threonine	1.26552	8.58395e-07
serine	1.54453	1.11387e-06
alanine	0.728377	2.27344e-07
Galactinol	1.76146	0.0336258
phosphomycin	1.82144	1.05905e-09
Leucrose	2.70273	6.73882e-15
valine	1.31801	4.12628e-12
glutamic acid	0.806637	1.10343e-08
Isoleucine	1.35178	3.4299e-12
beta-Alanine	0.418164	5.38667e-13
Isopropyl-beta-D-thiogalactopyranoside	2.62219	5.68647e-14
lysine	1.56002	6.8602e-10
glutamine	5.5699	1.15629e-09
Dioctyl phthalate	7.63323	3.6791e-14
phenylalanine	1.27188	2.99232e-10
beta-Mannosylglycerate	2.46293	3.01911e-15
Threitol	0.355699	0.00522892
leucine	1.35344	1.89937e-09
Data are from 6-independent experiments
Blue indicates metabolites downregulated, green indicated metabolites upregulated by AGER overexpression
